# Supplementary material
Source: MDPI journal article supplement (https://www.mdpi.com/2571-550X/2/3/23)
Supplement: s1 [file s1]

Identification of mast years in monitoring data and lake sediment records (Figure S1), for beech (left) and spruce (right).

For beech, years with a flowering index above 2.5, a fructification index above 0.3 or a pollen index above 250 are considered to be years with exceptionally intense flowering (indicated with 'x'). For spruce, only the flowering index is available. Here, those years are indicated that show widespread intense flowering, i.e. in all three forest regions of the study area, and those with intense flowering in only one or two forest regions.

In the lake records, the years correctly identified as pollen mast years using the 'higher than neighbour' approach are also indicated with 'x', false negatives with 'n', and false positives with 'p'. Grey and green filling indicate the period covered by each data set.

Tabelle Paper

| Year | monitoring beech |             |           | cores beech |          |        | flowering spruce |          | cores spruce |        |
|------|------------------|-------------|-----------|-------------|----------|--------|------------------|----------|--------------|--------|
|      | Flwl >= 2.5      | Frul >= 0.3 | Pl >= 250 | TSK15-K1    | TSK15-K7 | ARS17A | Widespread       | regional | TSK15-K7     | ARS17A |
| 2018 |                  |             |           |             |          |        |                  | x        |              |        |
| 2017 |                  |             |           |             |          |        |                  | x        |              |        |
| 2016 | x                | x           | x         |             |          | x      |                  | x        |              | p      |
| 2015 |                  |             |           |             |          |        |                  |          |              | x      |
| 2014 | x                | (x)         | x         | n           |          | n      | x                | x        |              |        |
| 2013 |                  |             |           |             |          |        |                  | x        |              |        |
| 2012 |                  |             |           |             |          |        |                  |          |              |        |
| 2011 | x                | x           | x         | x           |          | x      | x                |          |              | x      |
| 2010 |                  |             |           |             |          |        |                  |          |              |        |
| 2009 | x                | x           | x         | n           |          | x      | x                |          |              | x      |
| 2008 |                  |             |           |             |          |        |                  | x        |              |        |
| 2007 | x                | x           | x         | n           | n        | n      |                  |          | p            |        |
| 2006 | x                | (x)         | x         | n           | x        | x      | x                |          | x            | x      |
| 2005 |                  |             |           |             |          |        |                  |          | p            |        |
| 2004 | x                | (x)         | x         | x           | x        | x      | x                |          | n            | n      |
| 2003 |                  |             |           |             |          |        |                  | x        | p            | x      |
| 2002 |                  |             |           |             |          | p      |                  |          |              |        |
| 2001 |                  |             |           |             |          |        |                  |          |              |        |
| 2000 | x                | (x)         | x         | x           | x        | x      |                  | x        | p            |        |
| 1999 |                  |             |           |             |          |        |                  |          |              |        |
| 1998 | x                | x           | x         | x           | n        | n      | x                |          | x            | x      |
| 1997 |                  |             |           |             |          |        |                  |          |              |        |
| 1996 |                  |             |           |             |          |        |                  |          | p            |        |
| 1995 | x                | x           | x         | x           | x        | x      |                  |          |              |        |
| 1994 |                  |             |           |             |          |        |                  |          |              |        |
| 1993 |                  |             |           |             |          |        |                  |          |              | p      |
| 1992 | x                | x           |           | x           | x        | x      | x                |          | n            | n      |
| 1991 |                  |             |           |             |          |        |                  |          |              |        |
| 1990 |                  | x           | x         | x           | n        | x      | (x)              | x        | x            | x      |
| 1989 |                  |             |           | x           | x        | x      |                  |          |              |        |
| 1988 |                  |             |           |             |          |        |                  |          |              |        |
| 1987 |                  |             | x         | n           | n        | x      |                  |          |              |        |
| 1986 |                  |             |           | p           |          |        |                  |          |              |        |
| 1985 |                  |             |           |             |          |        |                  |          |              |        |
| 1984 |                  |             |           |             |          |        |                  |          |              |        |
| 1983 |                  | x           | x         | n           | x        | x      |                  |          | x            | x      |
| 1982 |                  |             |           |             |          |        |                  |          |              |        |
| 1981 |                  |             |           |             |          | p      |                  |          |              |        |
| 1980 |                  |             |           |             |          |        |                  |          | x            |        |

Figure S1. Identification of mast years in monitoring data and lake sediments.
